# Supplementary material for: Why do older adults stand-up differently to young adults?: investigation of compensatory movement strategies in sit-to-walk
Source: PubMed Central journal article supplement (PMC9445096; doi:10.1038/s41514-022-00094-x), 2022-09-05
Supplement: 41514_2022_94_MOESM1_ESM.pdf [file 41514_2022_94_MOESM1_ESM.pdf]

**Supplementary Table 1** - Anatomical locations of reflective markers. Total number of markers = 84

| Segment  | Markers         | Nr. | Anatomical location                                        |
|----------|-----------------|-----|------------------------------------------------------------|
| Thorax   | C7              | 1   | 7th cervical vertebra                                      |
|          | T8              | 2   | 8th thoracic vertebra                                      |
|          | IJ              | 3   | Sternum jugular notch                                      |
|          | MA              | 4   | Sternum manubrium                                          |
|          | PX              | 5   | Sternum xiphoid process                                    |
| Pelvis   | RASIS           | 6   | Right anterior superior iliac spine                        |
|          | LASIS           | 7   | Left anterior superior iliac spine                         |
|          | RPSIS           | 8   | Right posterior superior iliac spine                       |
|          | LPSIS           | 9   | Left posterior superior iliac spine                        |
| Clavicle | P1,P2,P3        | 10  | Cluster of three markers placed on the pelvis              |
|          | LA              | 11  | Left Acromioclavicular joint                               |
|          | RA              | 12  | Right Acromioclavicular joint                              |
| Scapula  | SC              | 13  | Sternoclavicular joint                                     |
|          | S1,S2,S3        | 14  | Scapula trackers (3 markers) placed on both scapula spines |
| Humerus  | HU1,HU2,HU3,HU4 | 15  | Cluster of four markers placed on the upper arm            |
|          | LE              | 16  | Lateral epicondyle                                         |
|          | ME              | 17  | Medial epicondyle                                          |
| Forearm  | U1,U2,U3,U4     | 18  | Cluster of four markers placed on the forearm              |
|          | US              | 19  | Ulnar styloid                                              |
|          | RS              | 20  | Radial styloid                                             |
| Hand     | H1,H2,H3        | 21  | Cluster of three markers placed on the back of the hand    |
| Foot     | FM2             | 22  | Head of the second metatarsal                              |
|          | FCC             | 23  | Calcaneus                                                  |
|          | FMT             | 24  | Tuberosity of the fifth metatarsal                         |
|          | TF              | 25  | Additional marker placed on the foot                       |
|          | FAM             | 26  | Apex of the lateral malleolus                              |
|          | TAM             | 27  | Apex of the medial malleolus                               |
| Shank    | C1,C2,C3,C4     | 28  | Cluster of four markers placed on the calf segment         |
| Knee     | FLE             | 29  | Lateral femoral epicondyle                                 |
|          | FME             | 30  | Medial femoral epicondyle                                  |
| Thigh    | T1,T2,T3, T4    | 31  | Cluster of four markers placed on the thigh segment        |

**Supplementary Table 2** - EMG sensor placement

| Sensor nr. | Abb.  | Muscle                         |
|------------|-------|--------------------------------|
| Left       |       |                                |
| 1          | SOL_L | Left Soleus                    |
| 2          | GAS_L | Left Medial Gastrocnemius      |
| 3          | TA_L  | Left Tibialis anterior         |
| 4          | HAM_L | Left Biceps femoris long head  |
| 9          | VAS_L | Left Vastus Lateralis          |
| 10         | GLU_L | Left Gluteus maximus           |
| 11         | RF_L  | Left Rectus Femoris            |
| 12         | HAB_L | Left Gluteus Medius            |
| Right      |       |                                |
| 5          | SOL_R | Right Soleus                   |
| 6          | GAS_R | Right Medial Gastrocnemius     |
| 7          | TA_R  | Right Tibialis anterior        |
| 8          | HAM_R | Right Biceps femoris long head |
| 13         | VAS_R | Right Vastus Lateralis         |
| 14         | GLU_R | Right Gluteus maximus          |
| 15         | RF_R  | Right Rectus Femoris           |
| 16         | HAB_R | Right Gluteus Medius           |

**Supplementary Table 3** To analyse task demand in relation to BOS, a trajectory comparison was done in which participants were divided into three BOS categories (wide, medium, small), based on their cML-BOS during rising. The Peak significant differences in joint moments, obtained via the trajectory analysis, are provided.

| Foot strategy groups  |                                | Wide                                                            | Medium                                                                       | Small                                                                        |
|-----------------------|--------------------------------|-----------------------------------------------------------------|------------------------------------------------------------------------------|------------------------------------------------------------------------------|
| <b>SELF</b>           |                                |                                                                 |                                                                              |                                                                              |
| Group                 |                                | N = 14                                                          | N = 14                                                                       | N = 16                                                                       |
|                       |                                | 5 YW, 7EW,<br>2EM<br>-----<br>5 ARM, 1 THIGH,<br>3 LEG, 5 OTHER | 5 YW, 4YM, 4EW, 7EM<br>-----<br>6 ARM, 2 THIGH,<br>5 LEG, 4 ARMF,<br>5 OTHER | 4 YW, 9YM, 1EW, 2EM<br>-----<br>4 ARM, 1 THIGH,<br>5 LEG, 1 ARMF,<br>5 OTHER |
| <b>Joint moments</b>  | <b>Timing<br/>(rise phase)</b> | <b>(Nm/BW)</b>                                                  | <b>(Nm/BW)</b>                                                               | <b>(Nm/BW)</b>                                                               |
| Hip Extension (step)  | 55%                            | -0.62                                                           |                                                                              | -0.39                                                                        |
|                       | 25%                            | -0.82                                                           | -0.61                                                                        |                                                                              |
| Knee Extension (step) | 5%                             | 0.77                                                            |                                                                              | 0.65                                                                         |
|                       | 17%                            | 0.74                                                            | 0.56                                                                         |                                                                              |
| <b>FAST</b>           |                                |                                                                 |                                                                              |                                                                              |
| Group                 |                                | N = 14                                                          | N = 25                                                                       | N = 11                                                                       |
|                       |                                | 4 YW, 8EW, 2EM<br>4 ARM, 1 THIGH,<br>3 LEG, 6 OTHER             | 8 YW, 6YM, 4EW, 7EM<br>9 ARM, 1 THIGH,<br>7 LEG, 5 ARMF,<br>3 OTHER          | 2 YW, 7YM, 2EM<br>3 ARM, 2 THIGH,<br>3 LEG, 4 OTHER                          |
| <b>Joint moments</b>  | <b>timing</b>                  | <b>(Nm/BW)</b>                                                  | <b>(Nm/BW)</b>                                                               | <b>(Nm/BW)</b>                                                               |
| Hip extension (step)  | -4%                            | -1.14                                                           | -0.72                                                                        |                                                                              |
|                       | 40%                            | -0.84                                                           |                                                                              | -0.48                                                                        |
| Knee extension (step) | 14%                            | 0.73                                                            | 0.48                                                                         |                                                                              |
|                       | 9%                             | 0.74                                                            |                                                                              | 0.54                                                                         |
